# Supplementary material
Source: publisher site journal article supplement (https://www.dovepress.com/get_supplementary_file.php?f=497539.docx)
Supplement: Supplementary file 1 [file get_supplementary_file.php]

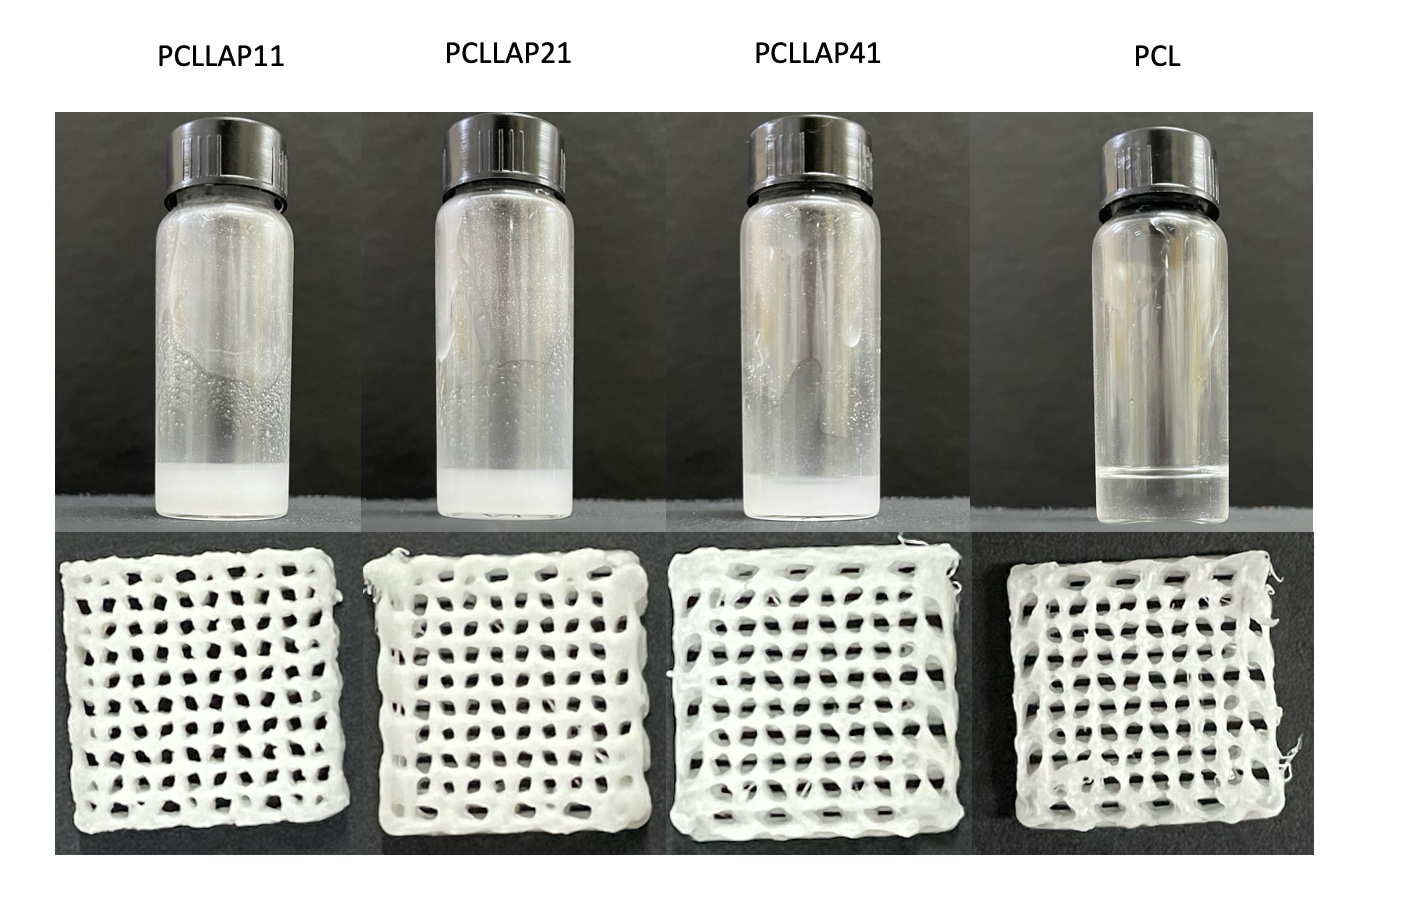


**Figure S1.** Visual aspect of the inks used for printing the scaffolds and the scaffolds obtained from each group.


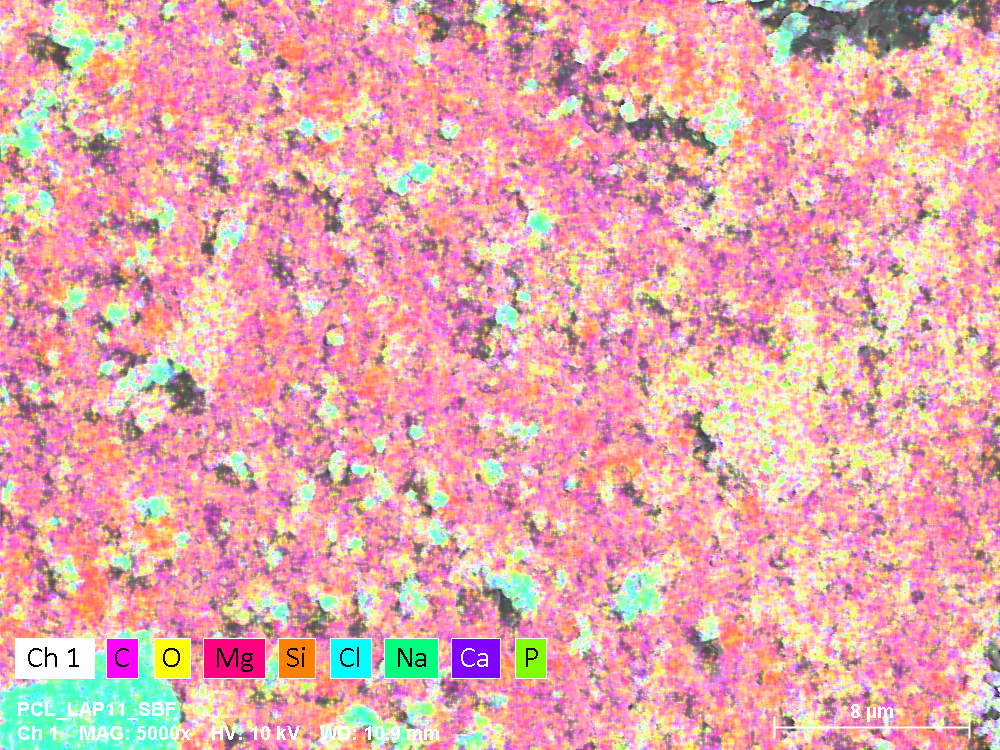

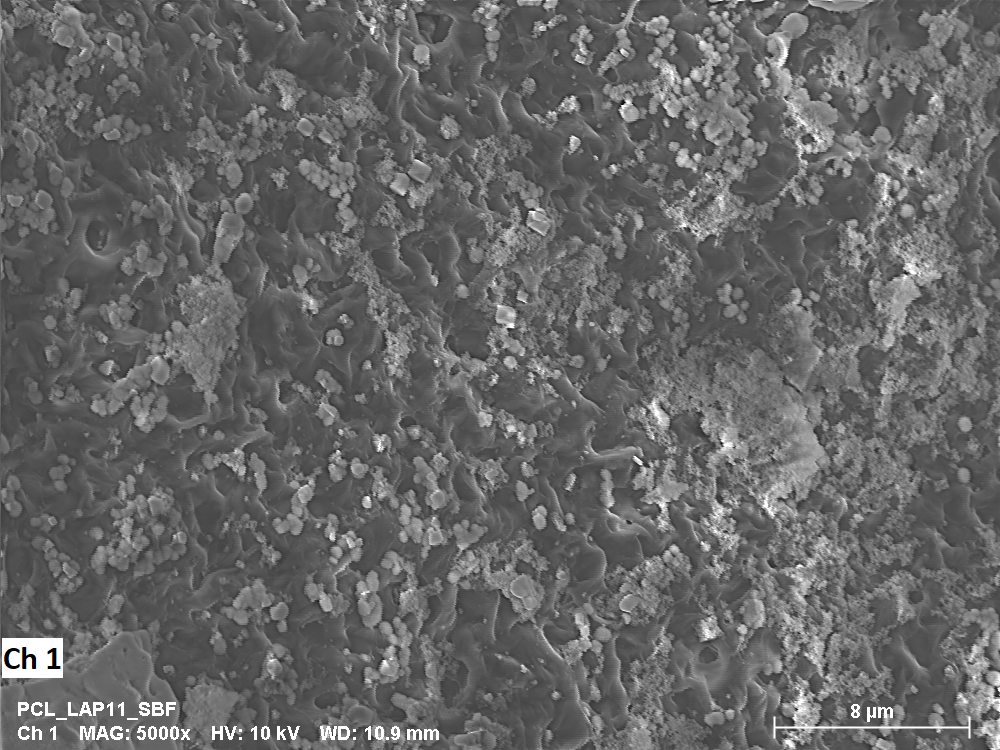


**Figure S2.** EDS mapping collecting from the SEM image of PCLLAP11 group


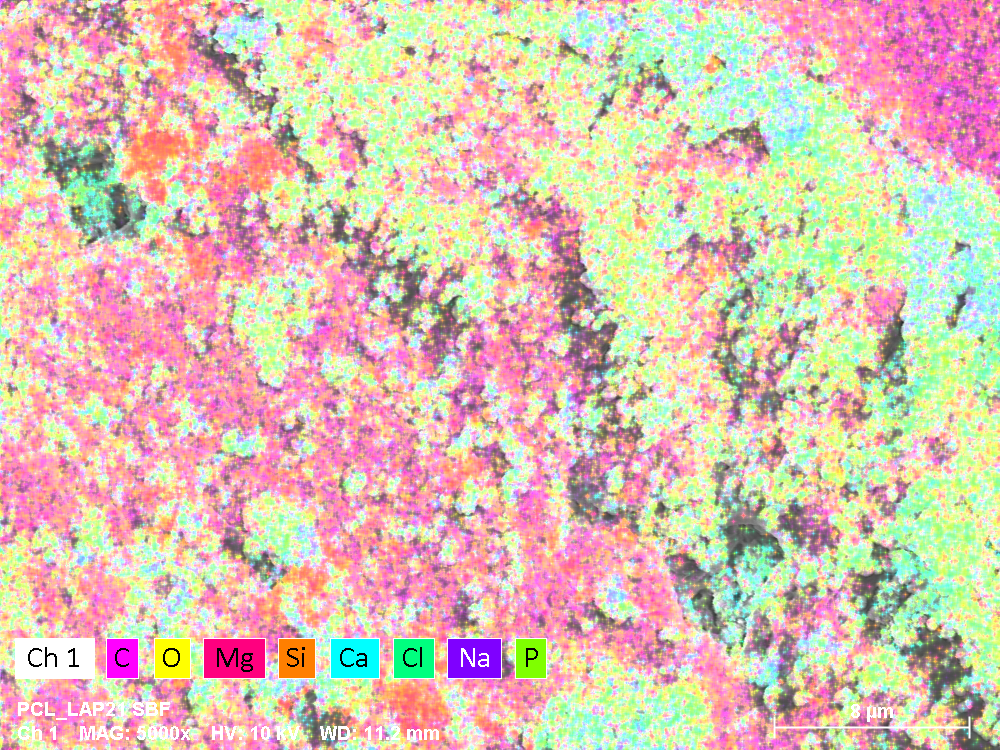

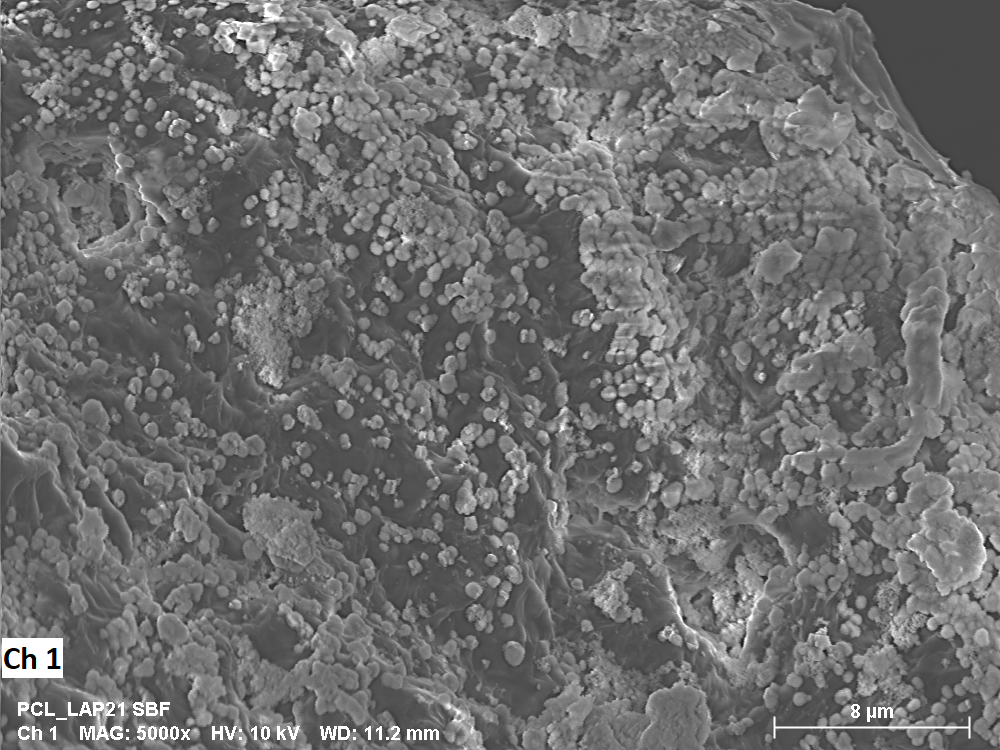


**Figure S3.** EDS mapping collecting from the SEM image of PCLLAP21 group


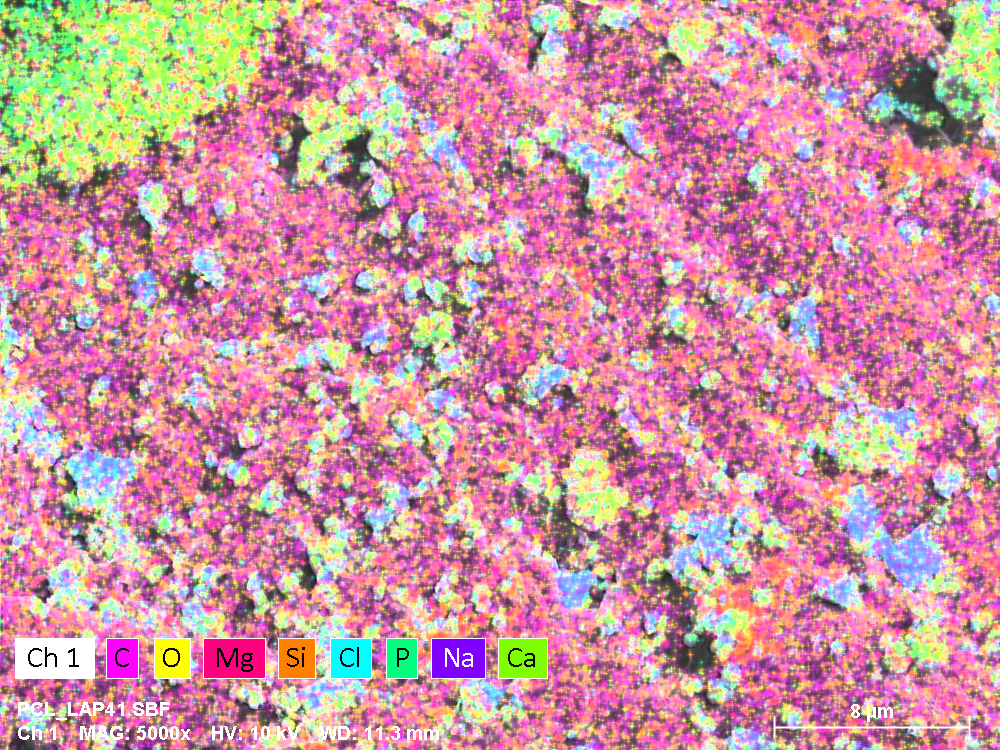

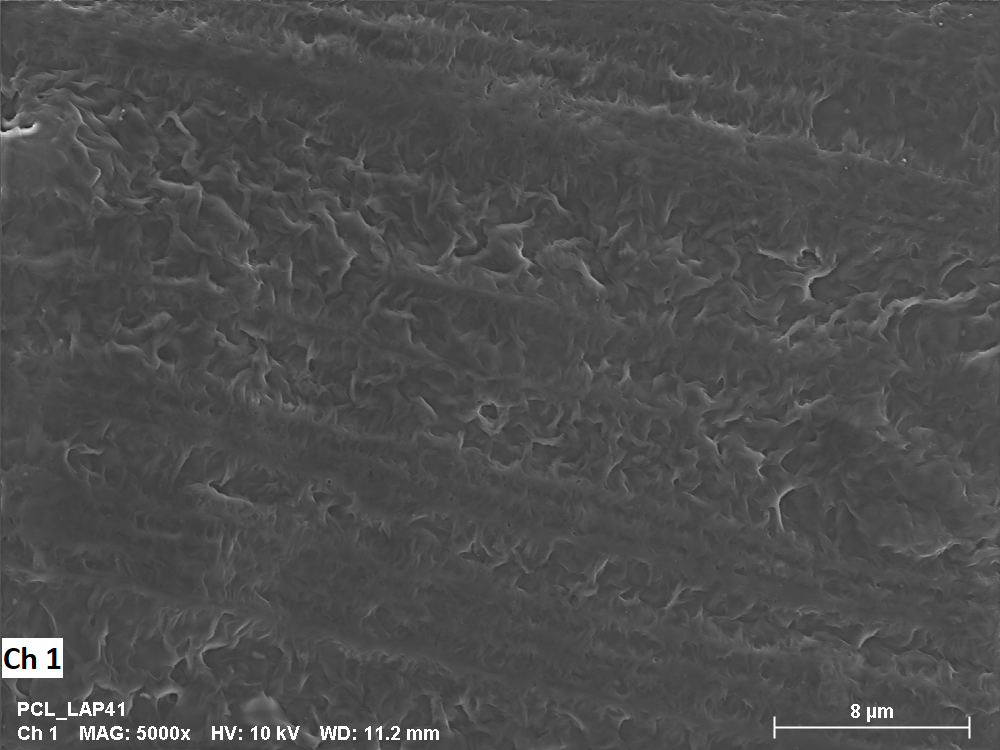


**Figure S4.** EDS mapping collecting from the SEM image of PCLLAP41 group


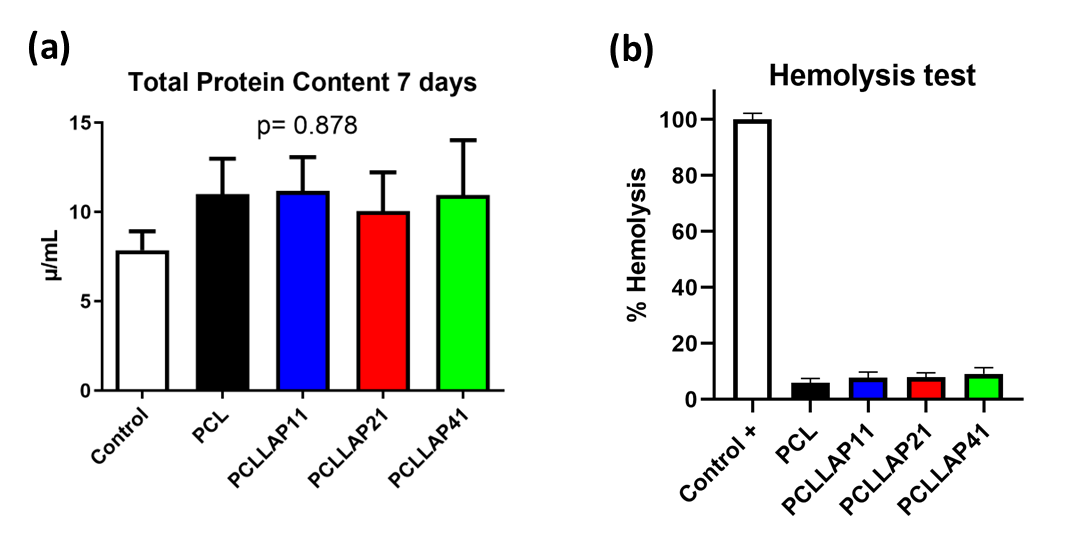


**Figure S5:** a) Total proteins counted after 7 days of the implantation of cells into the material surface; (b) hemolytic property trial made in each group to evaluate the material capability to cause a hemolytic process. data presented as mean value ± standard, *n* = 3, deviation analyzed by one-way ANOVA (*p* < 0.05).
